# Supplementary material for: Synthesis of low-molecular weight and branched polyethylenes via ethylene polymerization using 9-(arylimino)-5,6,7,8-tetrahydrocyclohepta-pyridylnickel precatalysts
Source: Royal Society of Chemistry journal article supplement (doi:10.1039/d4dt02159b), 2024-01-01
Supplement: d4dt02159b1.pdf [file d4dt02159b1.pdf]

Supporting Information for

**Low-molecular weight and branched polyethylenes via ethylene polymerization by 9-(arylimino)-5,6,7,8-tetrahydrocycloheptapyridylnickel precatalysts**

Zhao Ning<sup>a,b</sup>, Yanping Ma<sup>\*a</sup>, Yanning Zeng<sup>\*b</sup>, Yizhou Wang<sup>a</sup>, Aoqian Xi<sup>b</sup>, Wen-Hua Sun<sup>\*a</sup>

<sup>a</sup> *Key Laboratory of Engineering Plastics and Beijing National Laboratory for Molecular Science, Institute of Chemistry, Chinese Academy of Sciences, Beijing 100190, China; Phone: +86- 1062557955; Email: myanping@iccas.ac.cn, whsun@iccas.ac.cn.*

<sup>b</sup> *College of Materials Science and Engineering, Guilin University of Technology, Guilin 541004, China; Email: ynzeng@glut.edu.cn*

Table of contents

1. **Figures S1–S10** <sup>1</sup>H/<sup>13</sup>C NMR spectra of **L1–L5**; all recorded in CDCl<sub>3</sub> at room temperature.
2. **Figures S11–S13** GPC curves of the polyethylene produced using **Ni5**/MAO at different reaction conditions and the effects on catalytic activity and molecular weight.
3. **Figures S14–S15** GPC curves of the polyethylene produced using **Ni1–Ni10**/MAO and the comparison trend of catalytic activity and molecular weight
4. **Figure S16–S17** <sup>1</sup>H/<sup>13</sup>C NMR spectra of the polyethylene sample produced using **Ni5**/MAO at 30 °C (entry 5, Table 6), recorded at 110 °C in 1,1,2,2-tetrachloroethane-*d*<sub>2</sub>.
5. **Table S1** Crystal data and structure refinement for **Ni3** and **Ni4**
6. **Table S2** Coordinates of the optimized structures: **Ni3-R** and **Ni5-R**.

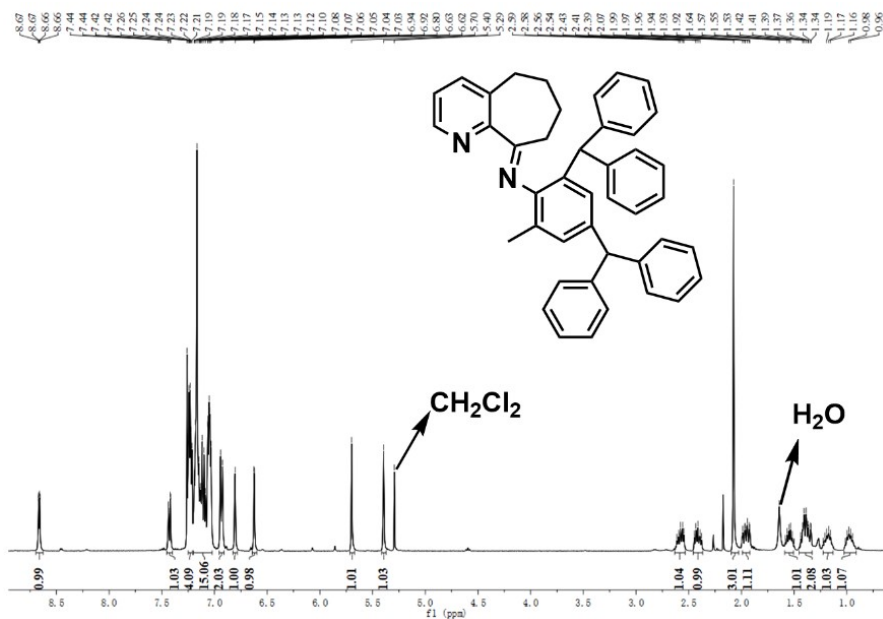

Figure S1.  $^1\text{H}$  NMR spectrum of L1

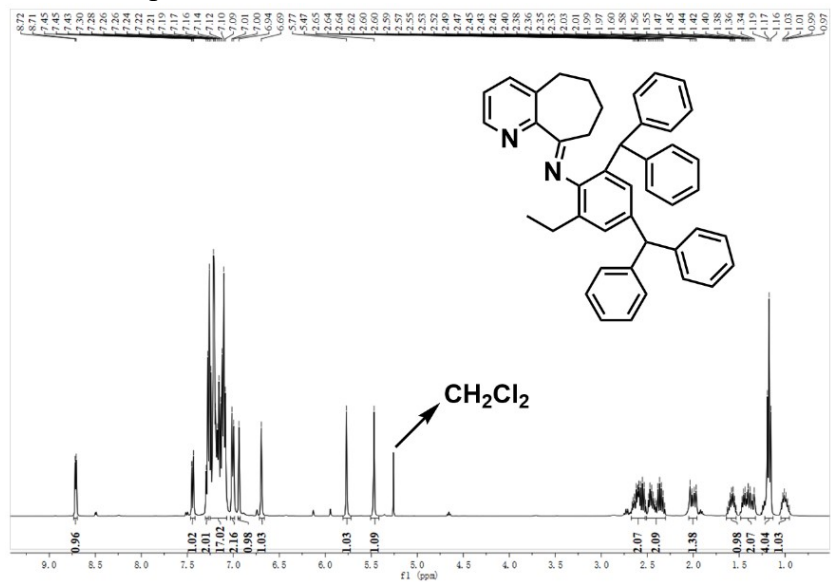

Figure S2.  $^1\text{H}$  NMR spectrum of L2

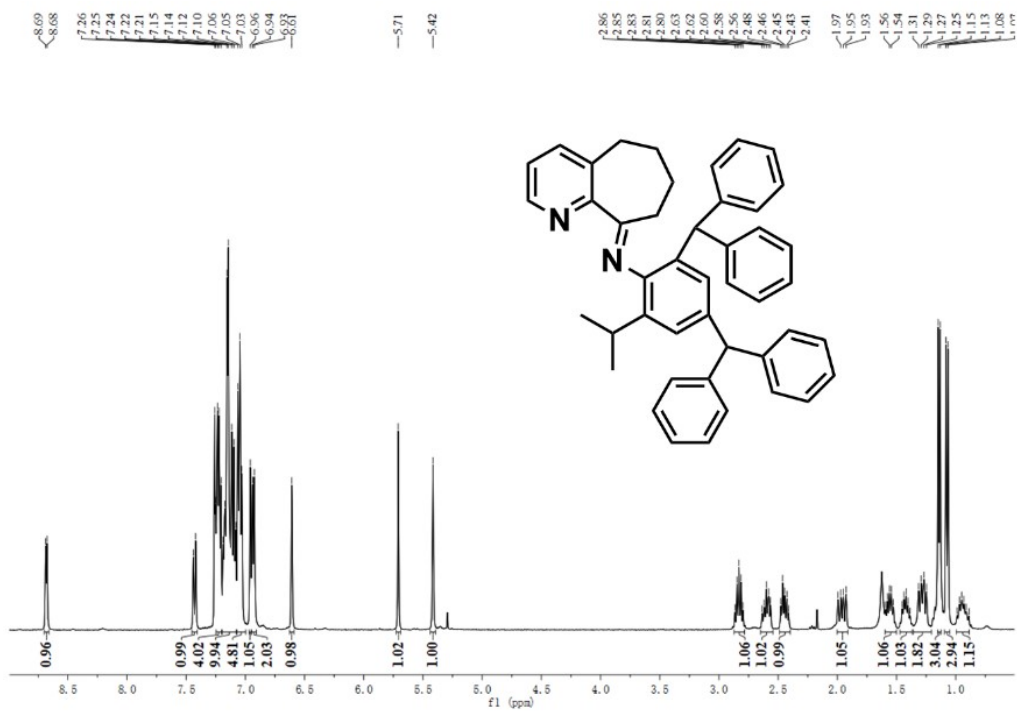

**Figure S3.  $^1\text{H}$  NMR spectrum of L3**

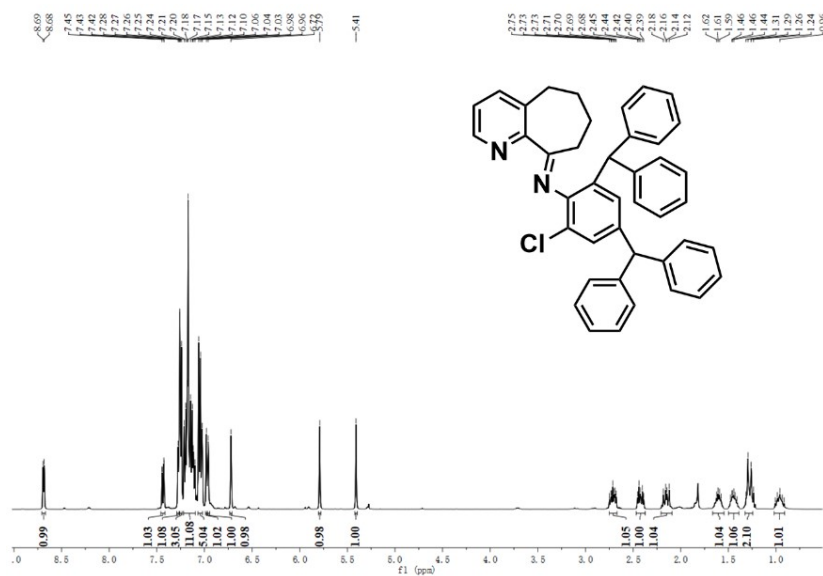

**Figure S4.  $^1\text{H}$  NMR spectrum of L4**

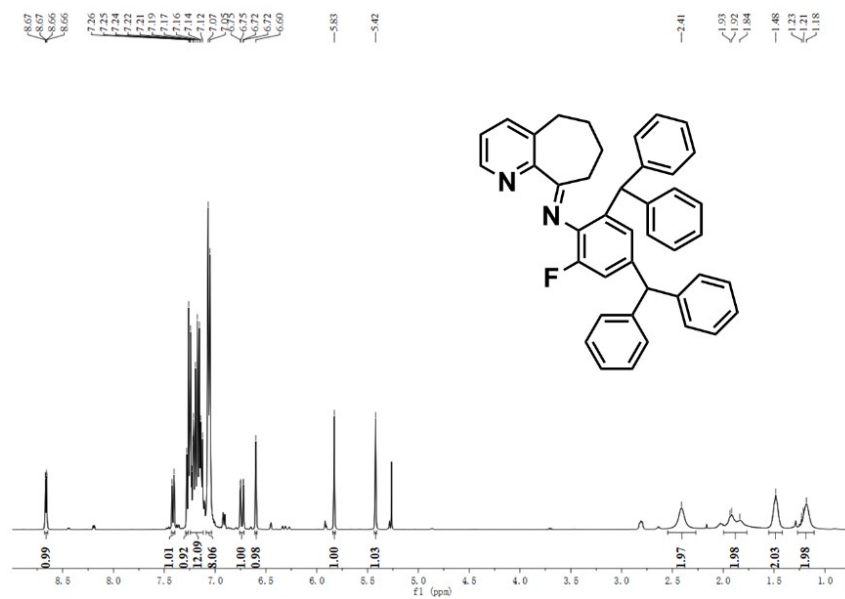

Figure S5.  $^1\text{H}$  NMR spectrum of L5

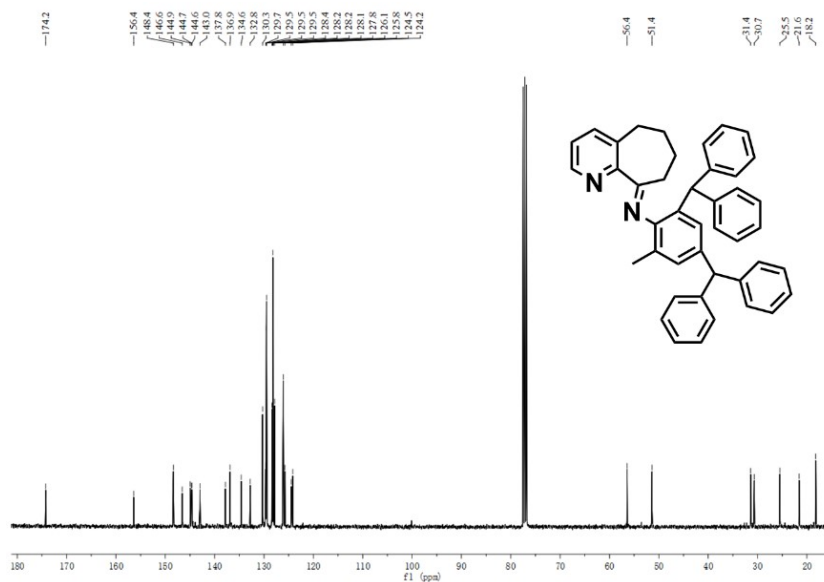

Figure S6.  $^{13}\text{C}$  NMR spectrum of L1

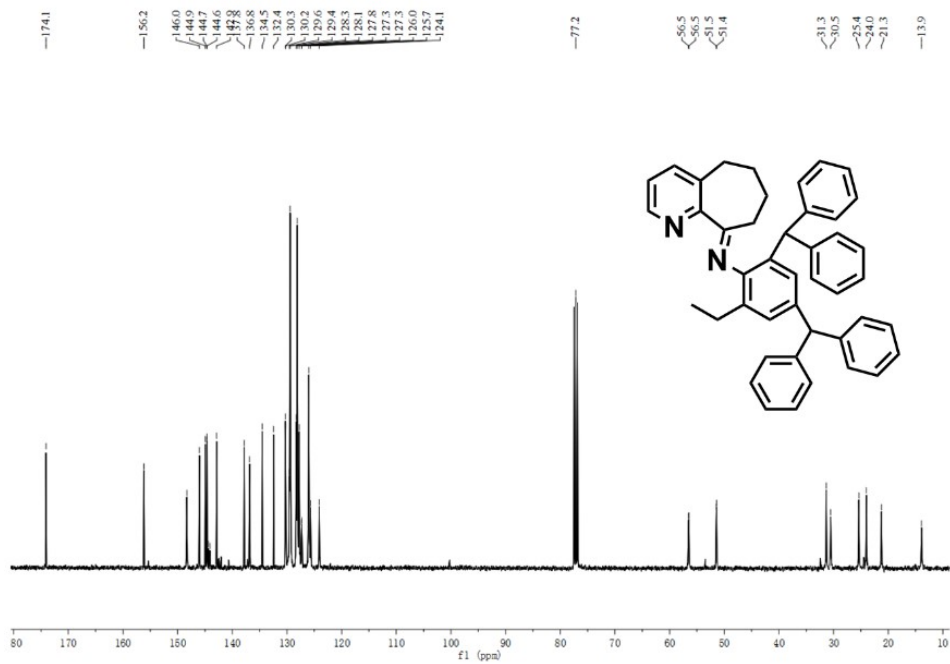

Figure S7.  $^{13}\text{C}$  NMR spectrum of L2

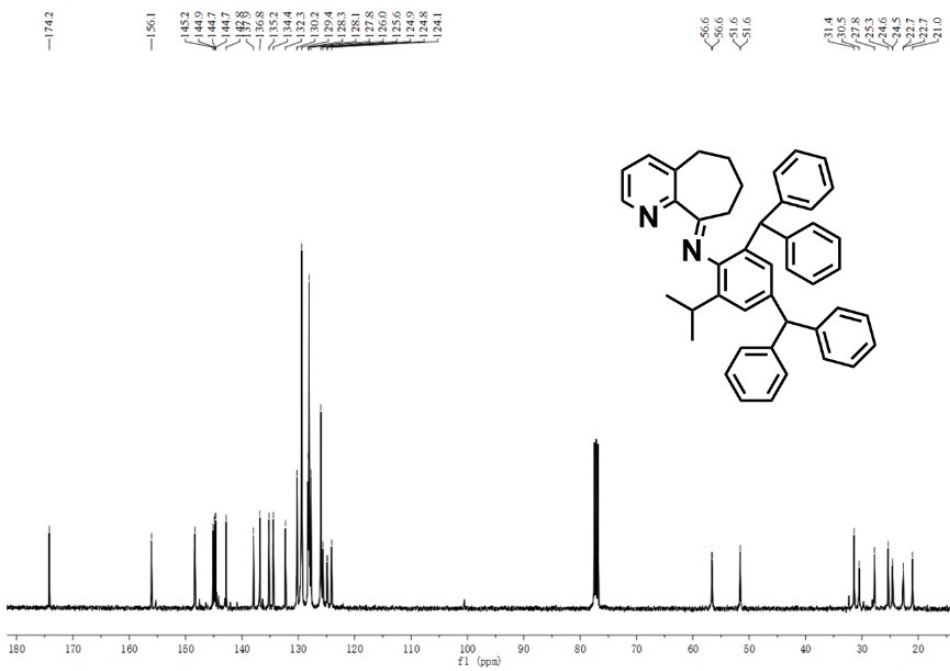

Figure S8.  $^{13}\text{C}$  NMR spectrum of L3

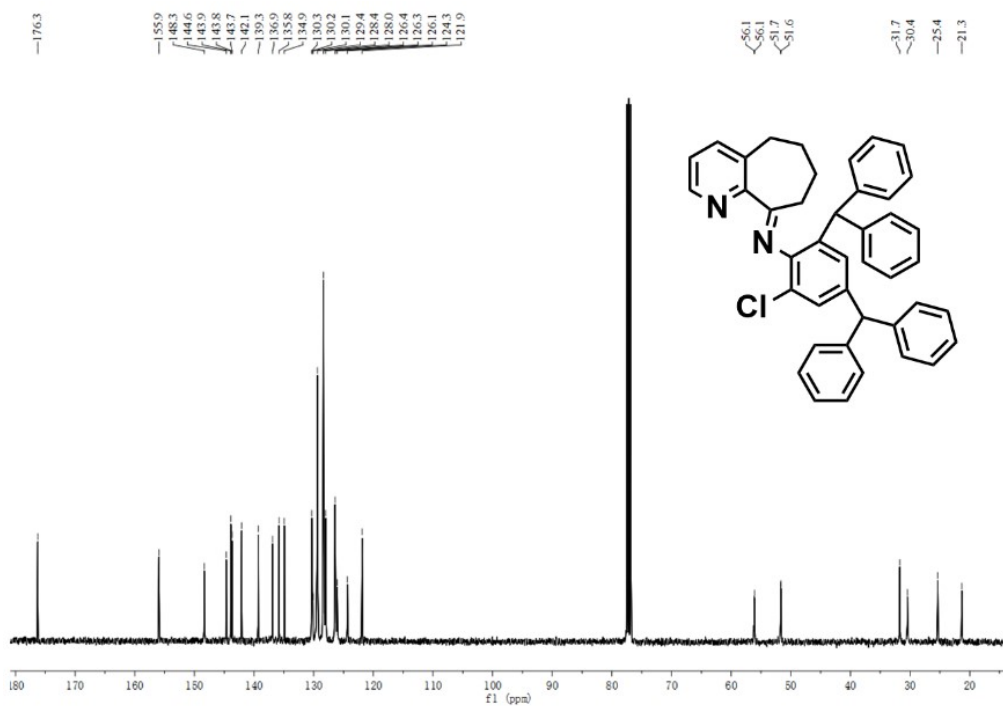

Figure S9.  $^{13}\text{C}$  NMR spectrum of L4

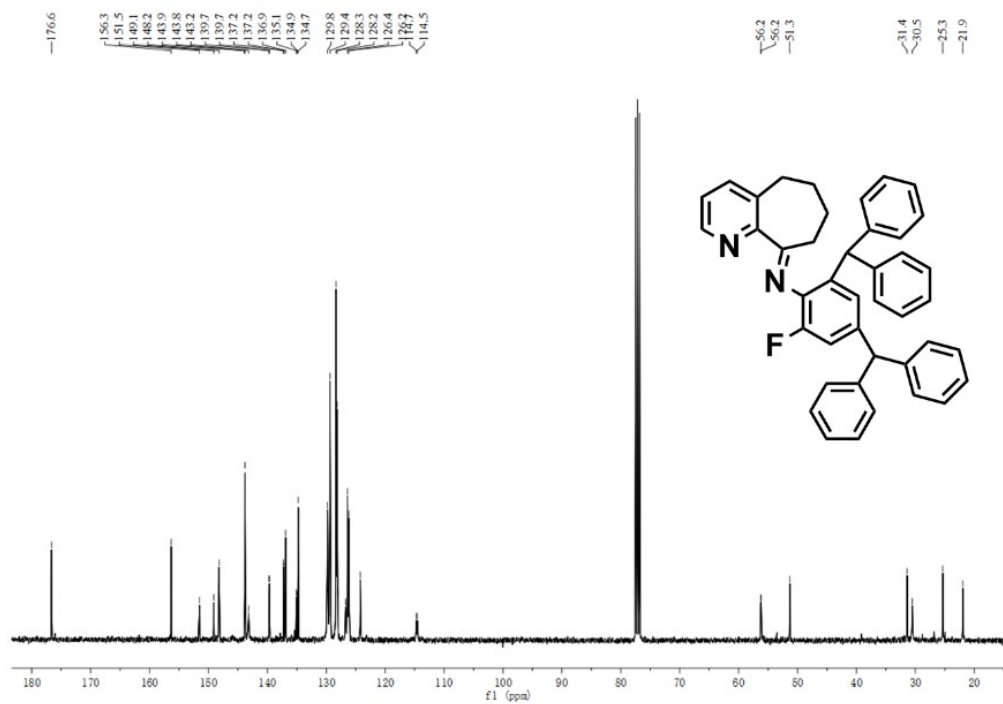

Figure S10.  $^{13}\text{C}$  NMR spectrum of L5

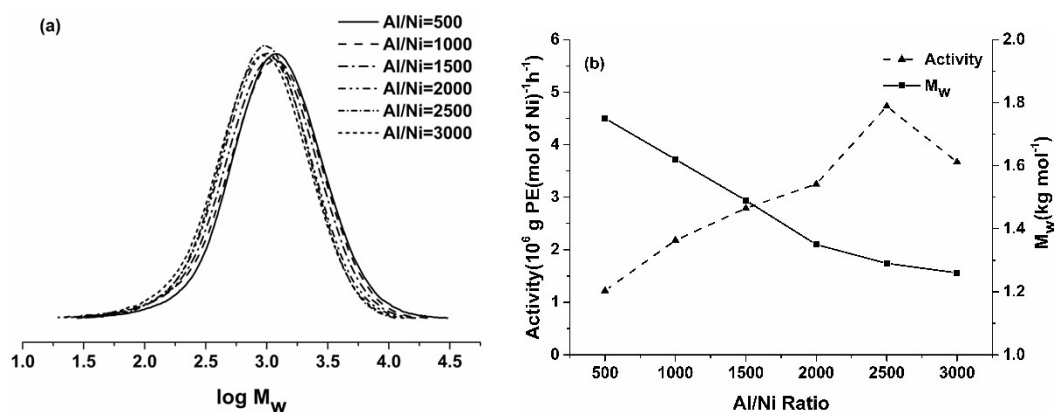

**Figure S11.** (a) GPC curves of the polyethylene produced using Ni5/MAO at different Al:Ni molar ratios; (b) the effects of Al/Ni molar ratios on catalytic activity and molecular weight of polyethylene (entries 1-6, Table 5).

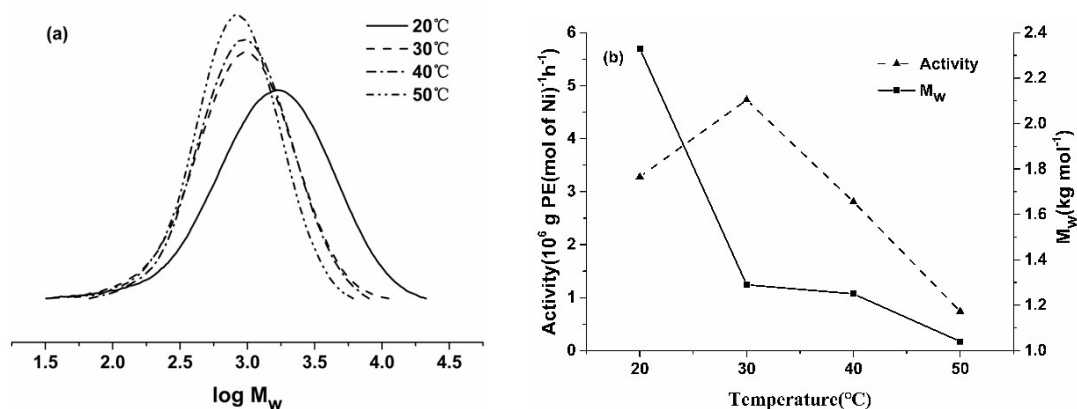

**Figure S12.** (a) GPC curves of the polyethylene produced using Ni5/MAO at different reaction temperatures; (b) the effects of reaction temperatures on catalytic activity and molecular weight of polyethylene (entries 5 and 7-9, Table 5).

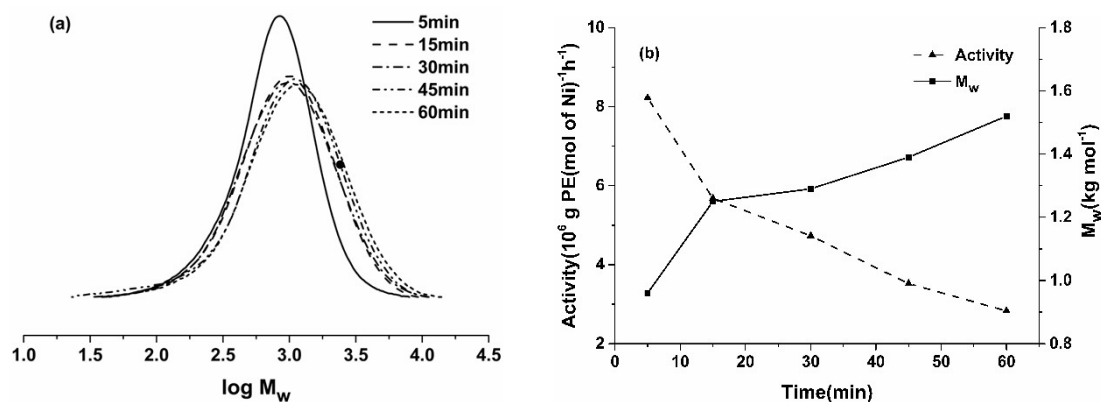

**Figure S13.** (a) GPC curves of the polyethylene produced using Ni5/MAO over different reaction times; (b) the effects of reaction times on catalytic activity and molecular weight of polyethylene (entries 5 and 10-13, Table 5).

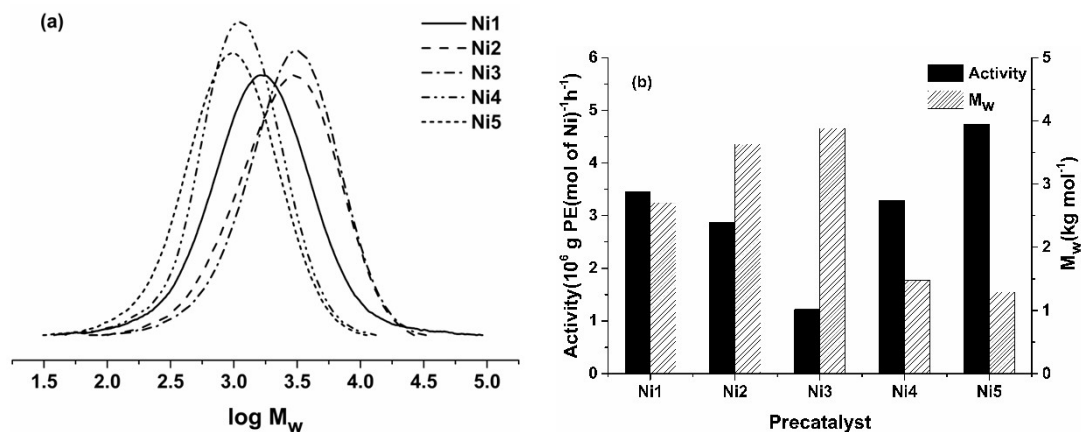

**Figure S14.** (a) GPC curves of the polyethylene; (b) the comparison trend of catalytic activity and molecular weight of polyethylene produced using Ni1-Ni5 with MAO as the co-catalyst (entries 1-5, Table 6).

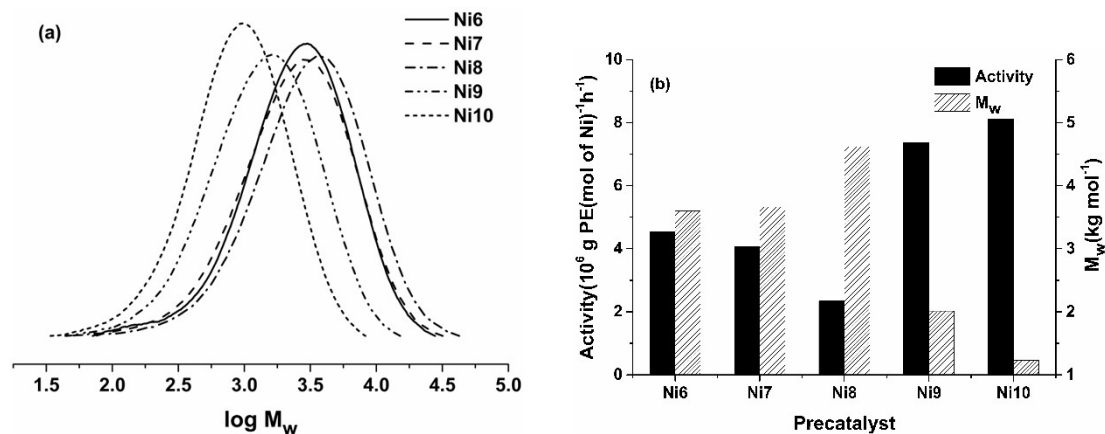

**Figure S15.** (a) GPC curves of the polyethylene; (b) the comparison trend of catalytic activity and molecular weight of polyethylene produced using Ni6-Ni10 with MAO as the co-catalyst (entries 6-10, Table 6).

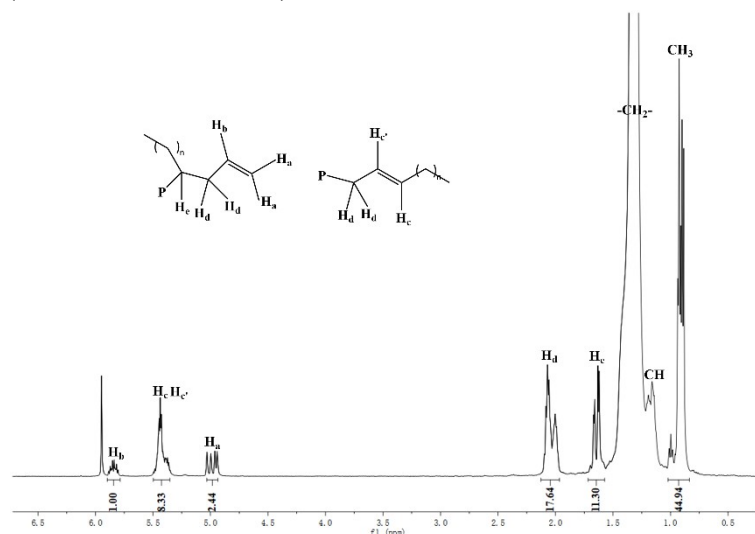

**Figure S16.**  $^1\text{H}$  NMR spectrum of the polyethylene sample produced using Ni5/MAO at 30 °C (entry 5, Table 6), recorded at 110 °C in 1,1,2,2-tetrachloroethane- $d_2$ .



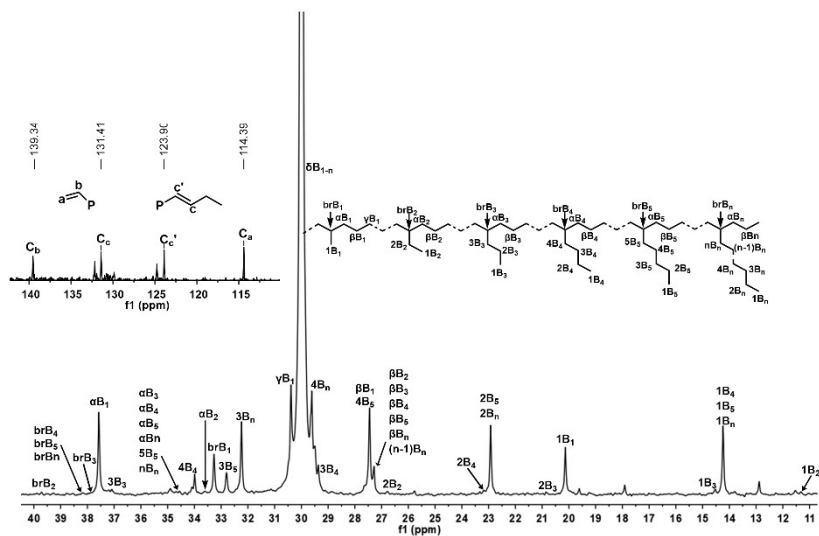

**Figure S17.**  $^{13}\text{C}$  NMR spectrum of the polyethylene sample produced using Ni5/MAO at 30 °C (entry 5, Table 6) along with an inset showing the  $\delta$  114-140 region and a segment of the assigned polymer backbone, recorded at 110 °C in 1,1,2,2-tetrachloroethane- $d_2$ .

**Table S1.** Crystal data and structure refinement for **Ni3** and **Ni4**

|                                             | <b>Ni3</b>                                                        | <b>Ni4</b>                                                                        |
|---------------------------------------------|-------------------------------------------------------------------|-----------------------------------------------------------------------------------|
| Crystal colour                              | yellow                                                            | orange                                                                            |
| Empirical formula                           | C <sub>45</sub> H <sub>42</sub> Br <sub>2</sub> N <sub>2</sub> Ni | C <sub>43</sub> H <sub>37</sub> Br <sub>2</sub> Cl <sub>3</sub> N <sub>2</sub> Ni |
| Formula weight                              | 829.33                                                            | 906.62                                                                            |
| Temperature/K                               | 169.99(10)                                                        | 169.99(10)                                                                        |
| Crystal system                              | monoclinic                                                        | monoclinic                                                                        |
| Space group                                 | P2 <sub>1</sub> /c                                                | I2/a                                                                              |
| a/Å                                         | 17.1583(5)                                                        | 24.1230(2)                                                                        |
| b/Å                                         | 22.9892(6)                                                        | 10.94452(8)                                                                       |
| c/Å                                         | 9.3758(3)                                                         | 30.6237(3)                                                                        |
| $\alpha$ /°                                 | 90                                                                | 90                                                                                |
| $\beta$ /°                                  | 93.252(3)                                                         | 107.5690(10)                                                                      |
| $\gamma$ /°                                 | 90                                                                | 90                                                                                |
| Volume/Å <sup>3</sup>                       | 3692.38(19)                                                       | 7707.96(12)                                                                       |
| Z                                           | 4                                                                 | 8                                                                                 |
| $\rho_{\text{calc}}$ g/cm <sup>3</sup>      | 1.492                                                             | 1.563                                                                             |
| $\mu$ /mm <sup>-1</sup>                     | 3.551                                                             | 5.326                                                                             |
| F(000)                                      | 1696.0                                                            | 3664.0                                                                            |
| Crystal size/mm <sup>3</sup>                | 0.15 × 0.08 × 0.05                                                | 0.25 × 0.2 × 0.18                                                                 |
| Radiation                                   | Cu K $\alpha$ ( $\lambda$ = 1.54184)                              | Cu K $\alpha$ ( $\lambda$ = 1.54184)                                              |
| 2 $\theta$ range                            | 5.158 to 154.044                                                  | 6.054 to 154.376                                                                  |
| Index ranges                                | -21 ≤ h ≤ 21<br>-12 ≤ k ≤ 28<br>-11 ≤ l ≤ 11                      | -30 ≤ h ≤ 25<br>-13 ≤ k ≤ 13<br>-37 ≤ l ≤ 38                                      |
| No. of rflns collected                      | 25573                                                             | 52421                                                                             |
| No. of unique rflns ( $R_{\text{int}}$ )    | 7534(0.0496)                                                      | 8019(0.0439)                                                                      |
| Completeness to $\theta$ (%)                | 96.6                                                              | 98.0                                                                              |
| Goodness-of-fit on $F^2$                    | 1.071                                                             | 1.061                                                                             |
| Final $R$ indexes [ $I \geq 2\sigma(I)$ ]   | $R_1 = 0.0515$ , $wR_2 = 0.1039$                                  | $R_1 = 0.0411$ , $wR_2 = 0.1117$                                                  |
| Final $R$ indexes [all data]                | $R_1 = 0.0633$ , $wR_2 = 0.1085$                                  | $R_1 = 0.0438$ , $wR_2 = 0.1138$                                                  |
| Largest diff. peak/hole / e Å <sup>-3</sup> | 0.74/-0.48                                                        | 1.62/-1.41                                                                        |

**Table S2: Coordinates of the optimized structures: Ni3-R and Ni5-R.**

| Ni3-R in Triplet: |                         |           |           | Ni3-R in Singlet        |           |           |
|-------------------|-------------------------|-----------|-----------|-------------------------|-----------|-----------|
| Atomic Type       | Coordinates (Angstroms) |           |           | Coordinates (Angstroms) |           |           |
|                   | X                       | Y         | Z         | X                       | Y         | Z         |
| C                 | -5.681543               | 0.777013  | 2.076653  | -6.525916               | 2.069873  | 1.041942  |
| C                 | -4.331080               | 0.443550  | 2.099888  | -5.459567               | 1.356710  | 1.578109  |
| N                 | -3.449885               | 1.016835  | 1.282942  | -4.217018               | 1.539171  | 1.144948  |
| C                 | -3.881677               | 1.966652  | 0.386089  | -3.945625               | 2.425106  | 0.153752  |
| C                 | -5.226630               | 2.323716  | 0.271207  | -4.968818               | 3.130077  | -0.492517 |
| C                 | -6.123603               | 1.704119  | 1.150945  | -6.269047               | 2.936396  | -0.004471 |
| C                 | -2.766129               | 2.582716  | -0.374053 | -2.488663               | 2.562225  | -0.130064 |
| C                 | -2.910083               | 3.782040  | -1.244134 | -1.977029               | 3.612893  | -1.056163 |
| C                 | -3.810993               | 3.587128  | -2.468822 | -2.391576               | 3.462529  | -2.525047 |
| C                 | -5.171964               | 2.950300  | -2.182458 | -3.889303               | 3.284534  | -2.764453 |
| C                 | -5.738923               | 3.259199  | -0.791193 | -4.767085               | 3.978031  | -1.718893 |
| N                 | -1.668848               | 1.985227  | -0.108198 | -1.740626               | 1.751697  | 0.538733  |
| C                 | -0.301934               | 1.850625  | 0.001101  | -0.320685               | 1.700648  | 0.507498  |
| C                 | 0.542629                | 2.825229  | 0.595626  | 0.463263                | 2.694705  | 1.127358  |
| C                 | 1.816081                | 2.413390  | 0.933297  | 1.843844                | 2.522012  | 1.102067  |
| C                 | 2.281747                | 1.100148  | 0.725171  | 2.448246                | 1.411297  | 0.506127  |
| C                 | 1.445196                | 0.174819  | 0.132918  | 1.636986                | 0.424638  | -0.038130 |
| C                 | 0.121921                | 0.496034  | -0.221070 | 0.250009                | 0.529608  | -0.006719 |
| C                 | 3.674829                | 0.746292  | 1.208671  | 3.955361                | 1.252133  | 0.587110  |
| C                 | -0.710296               | -0.444025 | -1.118189 | -0.638113               | -0.614580 | -0.467917 |
| Ni                | -1.604223               | 0.598211  | 1.075485  | -2.640524               | 0.422908  | 1.660377  |
| C                 | -1.260416               | -0.636653 | 2.478002  | -3.092798               | -1.042796 | 2.792607  |
| C                 | 3.743110                | 0.775718  | 2.726190  | 4.405045                | 0.913044  | 2.000251  |
| C                 | 4.932473                | 1.164483  | 3.344054  | 5.689404                | 1.286054  | 2.401024  |
| C                 | 5.043546                | 1.175413  | 4.729477  | 6.163211                | 0.960850  | 3.665572  |
| C                 | 3.961719                | 0.796606  | 5.519055  | 5.356901                | 0.249816  | 4.550289  |
| C                 | 2.773798                | 0.401289  | 4.913619  | 4.078982                | -0.132498 | 4.158989  |
| C                 | 2.665344                | 0.389646  | 3.525921  | 3.604189                | 0.198928  | 2.892696  |
| C                 | 4.196781                | -0.546070 | 0.610129  | 4.499987                | 0.271847  | -0.435119 |
| C                 | 4.807757                | -0.511523 | -0.645186 | 4.962125                | 0.741844  | -1.664276 |
| C                 | 5.257592                | -1.678918 | -1.250404 | 5.413536                | -0.140713 | -2.640544 |
| C                 | 5.093194                | -2.902222 | -0.606885 | 5.396620                | -1.510678 | -2.401378 |
| C                 | 4.479238                | -2.947631 | 0.640279  | 4.933645                | -1.990681 | -1.179511 |
| C                 | 4.034268                | -1.776843 | 1.246754  | 4.497333                | -1.105648 | -0.199947 |
| C                 | -1.102402               | 0.210845  | -2.428516 | -1.287444               | -0.352623 | -1.807317 |
| C                 | -0.269871               | 1.111956  | -3.095310 | -0.549557               | 0.152048  | -2.880538 |
| C                 | -0.654343               | 1.660181  | -4.315904 | -1.150915               | 0.345848  | -4.121089 |

|   |           |           |           |           |           |           |
|---|-----------|-----------|-----------|-----------|-----------|-----------|
| C | -1.875512 | 1.313887  | -4.887587 | -2.501668 | 0.055793  | -4.298971 |
| C | -2.713154 | 0.416480  | -4.229362 | -3.246726 | -0.439152 | -3.231923 |
| C | -2.327261 | -0.126701 | -3.008230 | -2.640106 | -0.642497 | -1.995668 |
| C | -0.018964 | -1.781175 | -1.293216 | 0.084106  | -1.942943 | -0.347741 |
| C | 0.901393  | -1.997932 | -2.318711 | 0.522552  | -2.674539 | -1.447631 |
| C | 1.613723  | -3.190413 | -2.382551 | 1.271385  | -3.836017 | -1.265017 |
| C | 1.411191  | -4.179685 | -1.425415 | 1.582766  | -4.277633 | 0.014582  |
| C | 0.485939  | -3.975559 | -0.407073 | 1.137858  | -3.556568 | 1.121620  |
| C | -0.226310 | -2.783153 | -0.344689 | 0.394452  | -2.399702 | 0.937951  |
| H | -6.368417 | 0.294366  | 2.764525  | -7.531758 | 1.922053  | 1.421711  |
| H | -3.935679 | -0.299313 | 2.788720  | -5.595372 | 0.620389  | 2.368374  |
| H | -7.180698 | 1.955477  | 1.091338  | -7.088871 | 3.474908  | -0.476123 |
| H | -1.910079 | 4.084306  | -1.576008 | -0.883993 | 3.629968  | -0.992819 |
| H | -3.297629 | 4.599713  | -0.614983 | -2.328429 | 4.583644  | -0.672830 |
| H | -3.270710 | 2.982659  | -3.209400 | -1.846525 | 2.619056  | -2.966882 |
| H | -3.948892 | 4.579019  | -2.916431 | -2.036452 | 4.366412  | -3.035513 |
| H | -5.108878 | 1.858539  | -2.295457 | -4.140075 | 2.213943  | -2.782000 |
| H | -5.885826 | 3.285984  | -2.942467 | -4.140284 | 3.666390  | -3.760198 |
| H | -5.536448 | 4.306197  | -0.519317 | -4.349799 | 4.961661  | -1.456297 |
| H | -6.831149 | 3.171670  | -0.808596 | -5.756806 | 4.187454  | -2.140354 |
| H | 2.490767  | 3.123125  | 1.411887  | 2.484212  | 3.254264  | 1.592318  |
| H | 1.810598  | -0.828150 | -0.075863 | 2.088095  | -0.472613 | -0.456461 |
| H | 4.338293  | 1.551642  | 0.851541  | 4.389205  | 2.236684  | 0.348004  |
| H | -1.668039 | -0.678759 | -0.610152 | -1.469785 | -0.675462 | 0.269901  |
| H | -2.057407 | -1.395016 | 2.583480  | -4.151355 | -1.338858 | 2.772184  |
| H | -0.332767 | -1.197882 | 2.276834  | -2.502000 | -1.951692 | 2.616954  |
| H | 5.782106  | 1.455510  | 2.726515  | 6.324761  | 1.832704  | 1.704008  |
| H | 5.976925  | 1.483814  | 5.194242  | 7.164620  | 1.263273  | 3.962428  |
| H | 4.045694  | 0.808964  | 6.602780  | 5.725024  | -0.005215 | 5.540961  |
| H | 1.922264  | 0.100431  | 5.521540  | 3.444890  | -0.691566 | 4.843642  |
| H | 1.729340  | 0.072231  | 3.062369  | 2.599749  | -0.104370 | 2.594409  |
| H | 4.935816  | 0.447319  | -1.148554 | 4.971231  | 1.814935  | -1.855904 |
| H | 5.744023  | -1.632912 | -2.222069 | 5.782378  | 0.243530  | -3.588775 |
| H | 5.448801  | -3.817647 | -1.074158 | 5.749793  | -2.202551 | -3.162192 |
| H | 4.350211  | -3.900221 | 1.149148  | 4.919616  | -3.060341 | -0.982636 |
| H | 3.566052  | -1.818630 | 2.228927  | 4.146036  | -1.487639 | 0.758789  |
| H | 0.690514  | 1.385355  | -2.656696 | 0.506275  | 0.384487  | -2.742031 |
| H | 0.008404  | 2.354458  | -4.826958 | -0.561510 | 0.724975  | -4.952675 |
| H | -2.170862 | 1.737259  | -5.844380 | -2.969609 | 0.206550  | -5.268698 |
| H | -3.667179 | 0.135177  | -4.669815 | -4.299007 | -0.680188 | -3.366055 |
| H | -2.977228 | -0.840209 | -2.499653 | -3.218064 | -1.060193 | -1.167647 |
| H | 1.069623  | -1.226757 | -3.068899 | 0.286216  | -2.337722 | -2.454812 |
| H | 2.336477  | -3.344327 | -3.180247 | 1.612103  | -4.395881 | -2.132554 |
| H | 1.976387  | -5.107375 | -1.472417 | 2.166169  | -5.184479 | 0.153168  |

|   |           |           |          |           |           |          |
|---|-----------|-----------|----------|-----------|-----------|----------|
| H | 0.316507  | -4.746682 | 0.340462 | 1.371782  | -3.898714 | 2.126855 |
| H | -0.941556 | -2.619085 | 0.462091 | 0.062629  | -1.820315 | 1.803677 |
| C | -0.002223 | 4.185089  | 0.964207 | -0.197135 | 3.799522  | 1.929755 |
| H | -0.698804 | 4.494509  | 0.170222 | -1.012255 | 4.234548  | 1.330645 |
| C | 1.073386  | 5.257622  | 1.076459 | 0.739859  | 4.938856  | 2.305773 |
| H | 1.727079  | 5.080886  | 1.939461 | 1.509310  | 4.607865  | 3.014108 |
| H | 1.698624  | 5.308107  | 0.178407 | 1.242876  | 5.364457  | 1.430425 |
| H | 0.609995  | 6.238661  | 1.223609 | 0.176807  | 5.740604  | 2.794981 |
| C | -0.786693 | 4.082476  | 2.277942 | -0.819849 | 3.200015  | 3.195905 |
| H | -1.224683 | 5.050586  | 2.546833 | -1.320485 | 3.970408  | 3.793349 |
| H | -1.595987 | 3.341253  | 2.228768 | -1.562634 | 2.422767  | 2.961209 |
| H | -0.114093 | 3.777490  | 3.090529 | -0.042293 | 2.737434  | 3.817391 |
| C | -1.107601 | 0.151793  | 3.772043 | -2.728116 | -0.393217 | 4.128563 |
| H | -2.005320 | 0.763197  | 3.965749 | -3.187619 | 0.612953  | 4.214947 |
| H | -0.285023 | 0.881127  | 3.669500 | -1.639278 | -0.224035 | 4.184829 |
| C | -0.839431 | -0.737147 | 4.980225 | -3.164598 | -1.214586 | 5.338118 |
| H | -0.710817 | -0.155925 | 5.901109 | -2.889574 | -0.732858 | 6.282400 |
| H | -1.667277 | -1.439440 | 5.140988 | -4.251192 | -1.360825 | 5.333919 |
| H | 0.065314  | -1.340494 | 4.827561 | -2.698686 | -2.206111 | 5.310992 |

### Ni5-R in Triplet:

### Ni5-R in Singlet

| Atomic Type | Coordinates (Angstroms) |          |           | Coordinates (Angstroms) |          |           |
|-------------|-------------------------|----------|-----------|-------------------------|----------|-----------|
|             | X                       | Y        | Z         | X                       | Y        | Z         |
| C           | -6.112369               | 1.906375 | 1.007546  | -6.543201               | 1.480044 | 1.134235  |
| C           | -5.024320               | 1.073748 | 1.231038  | -5.445818               | 0.704957 | 1.488770  |
| N           | -3.793279               | 1.393342 | 0.833616  | -4.220606               | 0.998356 | 1.063087  |
| C           | -3.577036               | 2.577296 | 0.178059  | -3.996981               | 2.076144 | 0.265965  |
| C           | -4.639098               | 3.425756 | -0.163772 | -5.055568               | 2.870271 | -0.192934 |
| C           | -5.914725               | 3.066643 | 0.284939  | -6.336178               | 2.545522 | 0.277692  |
| C           | -2.145459               | 2.864516 | -0.066844 | -2.554668               | 2.320513 | -0.015752 |
| C           | -1.694629               | 4.101420 | -0.770543 | -2.096252               | 3.579427 | -0.666625 |
| C           | -2.225596               | 4.263364 | -2.200326 | -2.529730               | 3.739951 | -2.129033 |
| C           | -3.746736               | 4.239690 | -2.360299 | -4.019545               | 3.539920 | -2.395103 |
| C           | -4.499719               | 4.609971 | -1.080475 | -4.910646               | 3.958137 | -1.221884 |
| N           | -1.367607               | 1.929731 | 0.381967  | -1.770113               | 1.376956 | 0.386002  |
| C           | 0.035017                | 1.867597 | 0.374799  | -0.362892               | 1.377459 | 0.380360  |
| C           | 0.908210                | 2.897357 | 0.729560  | 0.382787                | 2.329439 | 1.078693  |
| C           | 2.280662                | 2.723719 | 0.731960  | 1.750546                | 2.221909 | 1.226998  |
| C           | 2.821959                | 1.490188 | 0.377421  | 2.416971                | 1.134265 | 0.658825  |
| C           | 1.955784                | 0.434508 | 0.074990  | 1.678853                | 0.176405 | -0.036534 |
| C           | 0.582476                | 0.596728 | 0.113565  | 0.298786                | 0.264522 | -0.161174 |

|    |           |           |           |           |           |           |
|----|-----------|-----------|-----------|-----------|-----------|-----------|
| F  | 0.403873  | 4.068996  | 1.129431  | -0.271527 | 3.345555  | 1.656849  |
| C  | 4.325524  | 1.283995  | 0.418736  | 3.908455  | 0.970881  | 0.887548  |
| C  | -0.387399 | -0.572173 | -0.048429 | -0.521896 | -0.796339 | -0.872303 |
| Ni | -2.273059 | 0.283799  | 0.771538  | -2.601515 | -0.082281 | 1.344300  |
| C  | -3.076943 | -1.261085 | 1.550324  | -1.828138 | -0.461816 | 3.053961  |
| C  | 4.836164  | 1.209169  | 1.846118  | 4.203962  | 0.604030  | 2.331471  |
| C  | 6.093054  | 1.736952  | 2.145073  | 5.411198  | 1.015465  | 2.898398  |
| C  | 6.613305  | 1.647711  | 3.430671  | 5.741368  | 0.663981  | 4.201591  |
| C  | 5.881248  | 1.024724  | 4.436742  | 4.866546  | -0.111299 | 4.957002  |
| C  | 4.629351  | 0.491258  | 4.148139  | 3.664545  | -0.533388 | 4.399059  |
| C  | 4.108855  | 0.584619  | 2.861259  | 3.333761  | -0.176560 | 3.094999  |
| C  | 4.748398  | 0.105594  | -0.441267 | 4.531169  | 0.013379  | -0.112958 |
| C  | 4.819922  | 0.280140  | -1.825358 | 4.814963  | 0.475011  | -1.400462 |
| C  | 5.112466  | -0.788115 | -2.663829 | 5.298477  | -0.387956 | -2.376205 |
| C  | 5.336352  | -2.052545 | -2.125948 | 5.502891  | -1.731936 | -2.075573 |
| C  | 5.270064  | -2.235954 | -0.749048 | 5.225445  | -2.200311 | -0.795883 |
| C  | 4.978466  | -1.163570 | 0.089984  | 4.744177  | -1.333293 | 0.181252  |
| C  | -1.296522 | -0.466193 | -1.275960 | -1.146104 | -0.254594 | -2.142628 |
| C  | -1.099613 | 0.517095  | -2.253219 | -0.411504 | 0.535530  | -3.029850 |
| C  | -1.936597 | 0.600091  | -3.360272 | -0.992579 | 1.009402  | -4.203129 |
| C  | -2.976628 | -0.309604 | -3.526680 | -2.323894 | 0.720929  | -4.492775 |
| C  | -3.146041 | -1.329498 | -2.595503 | -3.068478 | -0.053439 | -3.606980 |
| C  | -2.303271 | -1.420211 | -1.494279 | -2.479545 | -0.538305 | -2.442745 |
| C  | 0.326621  | -1.907405 | 0.025345  | 0.259340  | -2.083491 | -1.029025 |
| C  | 0.846829  | -2.493429 | -1.128769 | 0.964672  | -2.392806 | -2.190263 |
| C  | 1.627334  | -3.640069 | -1.036645 | 1.791871  | -3.511782 | -2.231274 |
| C  | 1.884827  | -4.214146 | 0.205076  | 1.914981  | -4.334878 | -1.117687 |
| C  | 1.363342  | -3.636666 | 1.358348  | 1.201656  | -4.040410 | 0.041340  |
| C  | 0.590921  | -2.484455 | 1.266957  | 0.380479  | -2.921180 | 0.082101  |
| H  | -7.094773 | 1.621032  | 1.369568  | -7.533215 | 1.233386  | 1.503843  |
| H  | -5.140307 | 0.123430  | 1.743467  | -5.541956 | -0.168698 | 2.130814  |
| H  | -6.757593 | 3.711623  | 0.045067  | -7.181333 | 3.146357  | -0.052762 |
| H  | -0.605483 | 4.106025  | -0.818230 | -1.005853 | 3.628640  | -0.616794 |
| H  | -1.966362 | 4.974098  | -0.159567 | -2.465328 | 4.421423  | -0.063075 |
| H  | -1.772826 | 3.489532  | -2.833986 | -1.949238 | 3.045009  | -2.749539 |
| H  | -1.828605 | 5.220235  | -2.560650 | -2.229731 | 4.752188  | -2.427689 |
| H  | -4.077556 | 3.240715  | -2.678286 | -4.220420 | 2.485330  | -2.636202 |
| H  | -4.037714 | 4.923898  | -3.164632 | -4.303800 | 4.109211  | -3.286856 |
| H  | -4.017023 | 5.458770  | -0.576207 | -4.532169 | 4.884959  | -0.765272 |
| H  | -5.509016 | 4.955627  | -1.329931 | -5.915502 | 4.204125  | -1.583518 |
| H  | 2.913258  | 3.552132  | 1.045011  | 2.280925  | 2.970208  | 1.812434  |
| H  | 2.379905  | -0.540103 | -0.155030 | 2.188601  | -0.681371 | -0.468869 |
| H  | 4.773450  | 2.185340  | -0.030267 | 4.363068  | 1.960033  | 0.712868  |
| H  | -0.915565 | -0.607194 | 0.981439  | -1.372260 | -1.029887 | -0.194526 |

|   |           |           |           |           |           |           |
|---|-----------|-----------|-----------|-----------|-----------|-----------|
| H | -4.075761 | -1.466711 | 1.134004  | -2.334684 | -1.303763 | 3.549384  |
| H | -2.476826 | -2.159680 | 1.332266  | -0.787223 | -0.769614 | 2.847238  |
| H | 6.669439  | 2.218904  | 1.355764  | 6.099596  | 1.615500  | 2.303522  |
| H | 7.592504  | 2.067525  | 3.647725  | 6.683791  | 0.997747  | 4.629033  |
| H | 6.285699  | 0.955500  | 5.443453  | 5.121655  | -0.385844 | 5.977515  |
| H | 4.053341  | 0.001496  | 4.929877  | 2.979514  | -1.145017 | 4.982083  |
| H | 3.127086  | 0.162303  | 2.642969  | 2.388988  | -0.514740 | 2.666186  |
| H | 4.640270  | 1.269726  | -2.247024 | 4.649271  | 1.526846  | -1.636800 |
| H | 5.173000  | -0.633348 | -3.738578 | 5.522613  | -0.010420 | -3.371258 |
| H | 5.572831  | -2.889727 | -2.778380 | 5.885752  | -2.409997 | -2.834644 |
| H | 5.450937  | -3.219289 | -0.320428 | 5.389361  | -3.247558 | -0.551799 |
| H | 4.931395  | -1.313648 | 1.167383  | 4.533327  | -1.706617 | 1.182108  |
| H | -0.285486 | 1.232691  | -2.149458 | 0.626574  | 0.775818  | -2.799305 |
| H | -1.760063 | 1.368846  | -4.110405 | -0.402575 | 1.609059  | -4.892365 |
| H | -3.630813 | -0.243190 | -4.392103 | -2.776644 | 1.092114  | -5.408961 |
| H | -3.926382 | -2.073392 | -2.733682 | -4.105941 | -0.292853 | -3.830069 |
| H | -2.424204 | -2.245659 | -0.797738 | -3.059476 | -1.168963 | -1.765790 |
| H | 0.654385  | -2.038021 | -2.099156 | 0.877512  | -1.752568 | -3.065956 |
| H | 2.038632  | -4.084735 | -1.939345 | 2.344681  | -3.738287 | -3.139696 |
| H | 2.490368  | -5.114388 | 0.272918  | 2.562635  | -5.207413 | -1.152476 |
| H | 1.557326  | -4.083295 | 2.330166  | 1.285784  | -4.683739 | 0.913709  |
| H | 0.197857  | -2.021117 | 2.174182  | -0.163226 | -2.676575 | 0.997464  |
| C | -3.115670 | -1.056860 | 3.056309  | -1.858969 | 0.790689  | 3.913183  |
| H | -3.626174 | -0.117195 | 3.320283  | -2.903815 | 1.055830  | 4.139697  |
| H | -2.090007 | -0.938346 | 3.440728  | -1.448905 | 1.646574  | 3.353682  |
| C | -3.794005 | -2.213725 | 3.780589  | -1.078399 | 0.631766  | 5.211970  |
| H | -3.798938 | -2.069621 | 4.866239  | -1.125474 | 1.535415  | 5.829130  |
| H | -4.835554 | -2.322025 | 3.451015  | -1.469000 | -0.203497 | 5.805331  |
| H | -3.285696 | -3.161855 | 3.568318  | -0.021373 | 0.424198  | 5.002696  |
